# Supplementary material for: Bench-to-bedside review: Ethical challenges for those in directing roles in critical care units.
Source: Springer Nature journal article supplement (doi:10.1186/cc2979), 2004-01-01
Supplement: Additional file 1 [file cc2979-s1.pdf]

Appendix:

A. *Ethical practice* means doing the right thing, at the right time, for the right reasons. *Ethics* concerns the **uncertainty** involved in making **choices** that affect other humans, either directly or via relationships and interactions - with regard to one's roles and **duties** both as a person (requiring a personal ethic) and as an employee (requiring a professional ethic). There is often, but not always, a conflict between two or more alternative choices that appear equally right, or that one feels an equal **obligation** to.

**B. Selected Articles:**

Resource Allocation

1. The American College of Chest Physicians & Society of Critical Care Medicine. 1990. Consensus Panel: Ethical and moral guidelines for the initiation, continuation, and withdrawal of intensive care. *Chest* 97(4): 949-58
2. American Lung Association, American Thoracic Society. 1997. Official Statement on the Fair allocation of intensive care unit resources. *Am J Respir Crit Care Med* 156: 1282-1301
3. Angelucci PA: Accept or divert ICU patients? a heated debate. *Dimensions of Crit Care Nurs* 19(5): 37-39, 2000
4. Baker R, Strosberg MA: Rationing intensive care. *JAMA* 272(19): 1480-1, 1994
5. Baltz J, Wilson JL: Age-based limitation for ICU care: is it ethical? *Crit Care Nurs (Dec)*: 65-72, 1995
6. Cohen CB: Ethical problems of intensive care. *Anesthesiology* 47: 217-27, 1977
7. Cohen-Almagor R: A critique of Callahan's utilitarian approach to resource allocation in health care. *Issues in Law & Medicine* 17(3): 247-61, 2002
8. Crippen D, Whetshtine L: ICU resource allocation: life in the fast lane. *Crit Care* 3: R47-R51, 1999
9. Engelhardt HT, Rie MA: Intensive care units, scarce resources, and conflicting principles of justice. *JAMA* 255(9): 1159-1164
10. Kalb PE and Miller DH: Utilization strategies for intensive care units. *JAMA* 261(16): 2389-2395, 1989
11. Lanken PN: Critical care medicine at a new crossroads: the intersection of economics and ethics in the intensive care unit. *Am J Respir Crit Care Med* 149: 3-5, 1994
12. Marsh FH: Commentary: on the allocation of critical care resources. *J Crit Care* 8(1): 60-3, 1993
13. Miller DH: The rationing of intensive care. *Critical Care Clinics* 10(1): 135-43, 1994
14. Noseworthy TW: Resource allocation of adult intensive care. *Annals of the Royal College of Physicians and Surgeons Canada* 21(3): 199-202, 1988
15. Rucker GM, et al: Seasonal bed closures in an intensive care unit: a qualitative study. *J. Crit. Care* 18(1): 25-30, 2003
16. Sanders JB: ICU admission and discharge screening criteria. *Nursing Administration Quarterly* (spring): 25-30, 1984
17. Snider GL: Allocation of intensive care: the physician's role. *Am J Respir Crit Care Med* 150: 575-80, 1994
18. Strosberg MA, Teres D: Intensive care unit admissions do not pass the reasonableness test. *Crit Care Med* 31: 2809-12, 2003
19. Swenson MD: Scarcity in the intensive care unit: principles of justice for rationing ICU beds. *Am J Med* 92: 551-55, 1992

20. Veatch R: The ethics of resource allocation in critical care. *Crit Care Clinics* 2(1): 73-89, 1986
21. Wilson K, Cook DJ: Economics and the intensive care unit: a conflict of interests? *J Crit Care* 12(3): 147-51, 1997
22. Zawacki BE: ICU physician's ethical role in distributing scarce resources. *Crit Care Med* 13(1): 57-60, 1985

#### Organizational

1. Benner P: Creating a culture of safety and improvement: a key to reducing medical error. *Am J Crit Care* 10(4): 281-4, 2001
2. Brody BA: The ethics of using ICU scoring systems in individual patient management. *Problems in Crit Care* 3(4): 662-70, 1989
3. DeMonaco HJ: Guidelines, pathways, and the end result. *Crit Care Med* 28(3): 889-90, 2000
4. Goodman KW: Critical care computing: outcomes, confidentiality, and appropriate use. *Crit Care Clinics* 12(1): 109-122, 1996
5. Knaus W: Ethical implications of risk stratification in the acute care setting. *Camb Q Healthcare Ethics* 2: 193-6, 1993
6. Leith B: The use of restraints in critical care. *Off J Can Assoc Crit Care Nurs* 9(3): 24-8, 1998
7. Mielke DA, Martin DK, Singer PA: Priority setting in a hospital critical care unit: qualitative case study. *Crit Care Med* 31: 2764-68, 2003
8. Nelson RM: Ethics in the intensive care unit: creating an ethical environment. *Crit Care Clinics* 13(3): 691-710, 1997
9. Ortiz-Pruit J: Physical restraint of critically ill patients: a human issue. *Crit Care Nurs Clin N Am* 7(2): 363-73, 1995
10. Robin ED: A critical look at critical care. *Crit Care Med* 11(2): 144-8, 1983

#### Policies and Protocols

1. Hamner JB: Visitation policies in the ICU: a time for change. *Crit Care Nurs* 10(1): 48-53, 1990
2. Luce JM, Wachter RM: The ethical appropriateness of using prognostic scoring systems in clinical management. *Crit Care Clinics* 10(1) 229-41, 1994
3. Tee N, Struthers C: It's time to change visiting policies in critical care units. *Can Nurse* 91(11): 22-7, 1995
4. York NL: Implementing a family presence protocol option. *Dimens Crit Care Nurs* 23(2): 84-8, 2004

#### Professional Roles

1. Debold VP: Managerial decision making in critical care areas: accounting for the effectiveness and efficiency of new technologies. *Crit Care Nurs Clin N Am* 9(1): 35-44, 1997
2. Strosberg MA, Teres MD, Fein IA, et al: Nursing perception of the availability of the intensive care unit medical director for triage and conflict resolution. *Heart & Lung* 19(5): 452-5, 1990

#### Ethics and Law

1. Smith DA: The law and intensive care: the role of the courts in the ethical decision-making process. *Crit Care Clinics* 2(1): 123-32, 1986

#### General ICU

1. Crausman RS, Armstrong JD: Ethically based medical decision making in the intensive care unit. *Crit Care Clinics* 12(1): 71-84, 1996
  2. DeVita MA, Groeger J, Truog R: Current controversies in critical care ethics: not just end of life. *Crit Care Med* 31(5), S343-S344, 2003
  3. Drought TS, Liaschenko J: Ethical practice in a technological age. *Crit Care Nurs Clin N Am* 7(2): 297-304, 1995
  4. Hall K: Intensive care ethics in evolution. *Bioethics* 11(3-4): 241-5, 1997
  5. Hawkey M, Steel A: Critical care: moral dimensions. *Nurs Times* 90(37): 58-9, 1994
  6. Kanoti GA, Orlowski JP, Vinicky J: Ethics in critical care medicine: conclusions. *Crit Care Clinics* 2(1): 183-6, 1986
  7. Marsden C: An ethical assessment of intensive care. *Intl J Tech Asses Health Care* 8(3): 408-18, 1992
  8. McKenzie L: Management ethics for the healthcare supervisor. *Health Care Superv* 11(4): 1-10, 1993
  9. Melia KM: Ethical issues and the importance of consensus for the intensive care team. *Soc Sci Med* 53: 707-19, 2001
  10. Orlowski JP: Ethical principles in critical care medicine. *Crit Care Clinics* 2(1): 13-25, 1986
  11. Prien T, Van Aken H: Ethical dilemmas in intensive care: can the problem be solved? *Current Opinions in Anaesthesiology* 12(2): 203-6, 1999
  12. Scheinkestel CD: The evolution of the intensivist: from health care provider to economic rationalist and ethicist. *Med J Aust* 164: 310-12, 1996
  13. Vittone SB: Ethics in the ICU. *Crit Care Nurs Clin N Am* 14: 157-63, 2002
- Other
1. Broom C: Conflict resolution strategies: when ethical dilemmas evolve into conflict. *Dimensions Crit Care Nurs* 10(6): 354-63, 1991
  2. Kendrick K, Cubbin B: Ethics in the intensive care unit: a need for research. *Nurs Ethics* 3(2) 157-64, 1996
  3. Stevens L, Cook D, Guyatt G, et al: Education, ethics, and end-of-life decisions in the intensive care unit. *Crit Care Med* 30(2): 290-6, 2002
